# Supplementary material for: Evictions and suicide: a follow-up study of almost 22 000 Swedish households in the wake of the global financial crisis
Source: HighWire-hosted journal article supplement (doi:10.1136/jech-2015-206419), 2015-11-04
Supplement: jech-2015-206419supp_abstract_in_Swedish.pdf [file jech-2015-206419supp_abstract_in_Swedish.pdf]

**Bakgrund** Varje år vräks miljoner människor i världen. Trots det är väldigt lite känt om betydelsen vräkningen har i deras liv. Denna brist på kunskap har även börjat noteras inom den suicidologiska litteraturen. Framstående forskare på området har därför pekat på det akuta behovet av ökade kunskaper om självmord som en möjlig konsekvens av vräkningsprocessen. **Metod** Denna artikel är ett försök att möta utmaningen. Vi jämför antalet självmord som inträffade under ett år efter de rättsliga utslagen om vräkning och som gick vidare till en ansökan om verkställelse under perioden 2009-2012 med en kontrollgrupp på 10 % av befolkningen, 16 år och äldre, dragen 31/12 2012. Vi har använt den statistiska metoden "penalized maximum likelihood logistic regression".

**Resultat** De som hade förlorat den juridiska rätten till sina hem och där värden hade ansökt om en verkställning av utslaget hade ungefär 4 gånger högre risk att begå självmord än dem som inte var exponerade för samma hot (OR=4.42). Resultatet är kontrollerat för demografiska, socioekonomiska och psykiska sjukdomar som föregått utslaget.

**Slutsats** Vräkningar är signifikant relaterat till självmord, även efter kontroll för flera andra kända riskfaktorer för självmord. Våra resultat visar hur viktigt det är att lyfta fram vräkningarna som ett betydelsefullt men tyvärr hittills dolt och negligerat socialt problem.
